1 Meta-analysis identifies microbial signatures of disease in murine models of inflammatory bowel  
2 disease

3

4 Sudipta Saha<sup>a</sup>, Alberto Martin<sup>b</sup>, William Wiley Navarre<sup>c\*</sup>

5

6 <sup>a</sup>Department of Global Health and Population, Harvard T. H. Chan School of Public Health,  
7 Boston, MA, USA

8 <sup>b</sup>Department of Immunology, University of Toronto, Toronto, ON, Canada;

9 <sup>c</sup>Department of Molecular Genetics, University of Toronto, Toronto, ON, Canada;

10

11 Running Head: Meta-analysis of murine IBD models

12

13 \* Address correspondence to William Wiley Navarre, [william.navarre@utoronto.ca](mailto:william.navarre@utoronto.ca)

14 661 University Avenue, Suite 1600

15 Toronto, ON. M5G 1M1

16 CANADA

17 (416) 946-5356 (office)

18 (416) 978-6885 (fax)

## 19 **ABSTRACT**

20 The gut microbiota plays a central role in modulating intestinal inflammation, but the  
21 identification of specific inflammation-associated microbes has remained elusive. Here, we  
22 perform a meta-analysis on metagenomic data from 12 different studies of murine colitis  
23 triggered by a variety of genetic and environmental factors with the goal of finding bacterial  
24 taxonomic groups that can act as signatures of health or disease across studies, and that can be  
25 used to discriminate between healthy and diseased mice. We leveraged recent developments in  
26 16S analysis tools to identify amplicon sequence variants (ASVs) instead of the traditional  
27 Operational Taxonomic Units, and used the EZTaxon reference database that distinguishes  
28 between currently unnamed and uncharacterized 16S phylotypes. Random Forest model and  
29 differential abundance analysis were used to detect microbial signatures that could consistently  
30 differentiate healthy from diseased mice, and a 'dysbiosis index' was constructed from these.  
31 This dysbiosis index was able to correctly distinguish samples derived from inflamed and non-  
32 inflamed mice in the majority of studies and significantly outperformed other frequently used  
33 metrics of dysbiosis including alpha-diversity, proteobacterial abundance, and the ratio of  
34 Bacteroidetes to Firmicutes. 10 of 12 bacteria we identify as associated with the diseased state  
35 are members of the order Bacteroidales, including several species from the abundant but poorly  
36 understood S24-7 family. The implications of these findings are discussed.

## 37 38 **INTRODUCTION**

39 The human gut contains vast numbers of bacteria, viruses and fungi that collectively  
40 make up the gut microbiota, which plays a pivotal role in the host's health (1). While the  
41 microbiome is important for fundamental host processes like digestion (2), metabolism (3) and

42 immune system development (4), changes in the microbiome, often termed dysbioses (5), have  
43 been linked to several diseases, including inflammatory bowel disease (IBD) (6). IBD is a group  
44 of relapsing and remitting inflammatory disorders that mainly manifest as Crohn’s disease or  
45 ulcerative colitis (7, 8). Human studies have mostly been retrospective cohort ones, which limits  
46 their utility in elucidating causal links between changes in the microbiome and disease onset.  
47 Regardless, understanding these changes remain important, especially if there is a particular  
48 “dysbiotic” microbiome, or microbiome members, associated with disease. Although 16S  
49 sequencing of the bacterial microbiota have allowed comprehensive investigations of such  
50 changes (9), inter-individual variability within studies, and a lack of standardized techniques  
51 across studies (differing extraction and sequencing protocols, 16S variable regions, analysis  
52 pipelines and taxonomic reference databases) hinders comparisons of large sample sets to find  
53 consistent microbial signatures of disease (10). In order to compare and synthesize results from  
54 different human studies, meta-analyses, starting from the original sequencing data, have been  
55 conducted, resulting in the discovery of consistent microbial signatures in IBD patients (11, 12).  
56 Such meta-analyses have significant potential for designing non-invasive sequencing based  
57 diagnostic tools for IBD onset (12). They also reveal interesting insights into the relationship  
58 between the microbiota and disease; for example, meta-analyses of microbiome studies  
59 investigating obesity and IBD suggest that although metrics like the Bacteroidetes to Firmicutes  
60 ratio and alpha diversity may be significant in some studies, they do not seem to be consistent  
61 across studies (11, 13). In spite of the contributions of human meta-analyses to clinical diagnosis  
62 and broad inferences, causal and mechanistic inference remains challenging.

63 To shed mechanistic insight on the link between IBD and the microbiota, murine models  
64 have been relied upon heavily (6, 14, 15). Yet, despite the professed advantages of

65 reproducibility and well-defined conditions, murine samples also seem to have significant inter-  
66 individual variability, lack of standardization across studies, and sample sizes are often small  
67 (14, 16). Furthermore, there are multiple widely-used mouse models for IBD, including Dextran  
68 Sodium Sulfate (DSS) induced colitis, 2,4,6-trinitrobenzenesulfonic acid (TNBS) induced colitis,  
69 T-cell adoptive transfer, and Interleukin-10 deficiency (17, 18). Studies investigating the role of  
70 various immunomodulatory genes in IBD also often report changes in the microbiota (19, 20).

71         The existing literature mostly consists of descriptions of microbiota changes associated  
72 with colitis in various mice models (19, 21, 22), with only some assessing colitogenic potential  
73 of particular microbiotas, or honing in on particular microbes (23, 24). The lack of  
74 standardization prevents meaningful comparison of the changes reported, and the question  
75 remains as to whether there are any consistent markers of inflammation in mice models. Reviews  
76 published have been descriptive (25, 26). Since there is little overlap between the human and  
77 murine microbiota, host-specific analysis is paramount (27). In the context of a poorly  
78 catalogued murine microbiota with limited cultured isolates (28), identification of a microbial  
79 signature can help focus isolation efforts and mechanistic studies on the best microbial  
80 candidates for further research in mouse models.

81         Here we report a meta-analysis of 12 studies/datasets that utilize 16S sequencing to  
82 describe a link between development of colitis and changes in the microbiota in murine models.  
83 We aimed to find bacterial taxonomic groups that are consistent signatures of health and disease  
84 across studies, and that can be used to discriminate between healthy and diseased mice. We only  
85 included studies whose raw 16S sequencing read files were available and thus were able to  
86 standardize the analysis and directly compare the studies. We leveraged recent developments in  
87 16S analysis tools to identify amplicon sequence variants (ASVs) instead of the traditional

88 Operational Taxonomic Units (OTUs) (29), and used the EZTaxon reference database that  
89 distinguishes between currently unnamed and uncharacterized 16S phylotypes (30). We used a  
90 Random Forest model and differential abundance analysis to detect any consistent microbial  
91 signatures that differentiate healthy from diseased mice, and constructed a “dysbiosis index”  
92 from these. Finally, since alpha diversity, Bacteroidetes-to-Firmicutes (BF) ratio and  
93 Proteobacteria levels are often used as markers of microbiome health, we investigated the utility  
94 of these in discriminating colitic from healthy samples (11, 13, 31).

95

## 96 **RESULTS**

### 97 **Study Search, Inclusion and Data Aggregation**

98 To identify studies that investigated the murine intestinal microbiota in the context of  
99 intestinal inflammation, we conducted a systematic search of NCBI PubMed for articles that  
100 contained terms relating to microbiota, intestinal inflammation and murine models in the title and  
101 abstract, published between 2012 and 2016, and was not a review. We followed the preferred  
102 reporting items for systematic reviews and meta-analyses (PRISMA) guidelines to limit  
103 inclusion bias (32). We screened the title and abstracts of 816 articles yielded by the search for  
104 eligibility, and obtained 2 additional studies from knowledge of published literature and our own  
105 currently unpublished dataset (Martin A. et al. unpublished) (819 total); 79 full-text articles were  
106 then assessed; 44 were retained to be checked for data availability; 10 had publicly available data  
107 and 2 provided access by the time of publication (19–22, 33–39) (**Table 1, Fig 1**).

108 Search terms and screening and inclusion strategy are outlined in Methods. Briefly, we  
109 looked for studies that did a 16S sequence-based analysis of non-synthetic murine microbiota in  
110 various IBD models before and after onset of colitis. We excluded infection-based inflammation

111 and samples administered antibiotics as these are likely to have changes that go well beyond  
112 colitis associated ones. Studies that only assessed microbiota before inflammation onset were  
113 excluded because we were interested in a microbial signature associated with the *onset* of colitis,  
114 rather than a microbiota that is associated with increased *susceptibility* to colitis.

115 Selection of relevant samples within the 12 studies yielded 601 samples, of which 434  
116 were healthy and 167 had colitis. We used a standardized custom data-processing pipeline to  
117 detect Amplicon Sequence Variants (ASVs) using the DADA2 algorithm that leverages quality  
118 information from sequence reads for sequence inference. Taxonomy was assigned using a  
119 custom script and the EZTaxon database to be able to distinguish and name currently uncultured,  
120 but sequenced, phylotypes. Only classified taxons were kept and after filtering for rare taxa and  
121 merging datasets, we obtained 1558 unique taxonomic groups (detailed methods in Materials and  
122 Methods).

123

## 124 **Beta Diversity**

125 Beta diversity, the between-sample diversity, can provide insight as to whether mice with  
126 colitis have a different microbial community structure compared to healthy mice (40). We  
127 calculated the Bray-Curtis distances (41) between samples and used Principal Coordinates  
128 Analysis (PCoA) to visualize the microbial communities. Plotting the samples on the first three  
129 coordinates suggested that samples tended to cluster by study more than by disease status (**Fig**  
130 **2a, b**). However, a Permutational Analysis of Variance (PERMANOVA) (42) suggested that  
131 microbiome composition differed by both disease status and study ( $p < 0.001$ ). Furthermore,  
132 within each study, PERMANOVA revealed significant differences due to disease status in all  
133 except one study (**Fig S1**). Visually, within each study, disease status often provided a stark

134 differentiation in PCoA plots, which was not replicated in the pooled data. However, the  
135 significant PERMANOVA result suggested the possibility of differences between communities  
136 based on disease status, across studies.

137

### 138 **Alpha Diversity**

139 Alpha diversity, the diversity of the microbiome within each sample, is regularly  
140 investigated as a marker of “health” in both human and mouse studies. While individual studies  
141 have found associations between reduced alpha diversity and obesity and IBD in humans, meta-  
142 analyses have found the evidence for such relationships to be weak (13, 43). Another oft-used,  
143 yet inconsistent, within-sample marker is the ratio of Bacteroidetes to Firmicutes ratio. Lastly, a  
144 bloom of Proteobacteria has also been associated with dysbiosis. We investigated the utility of  
145 using these markers in discriminating between healthy and diseased mice.

146 In our meta-analysis, we do not find a consistent relationship between alpha diversity and  
147 colitis in mice. Seven of the 11 studies had significant differences in the Shannon index ( $H$ )  
148 between healthy and diseased mice, with 5 having higher values of  $H$  (lower diversity) in  
149 healthy, and 2 having higher diversity in healthy (**Fig 3a**). Similarly, there was no consistent  
150 relationship between colitis and the Bacteroidetes to Firmicutes ratio; 2 studies had a  
151 significantly lower ratio in healthy, while 2 had a significantly higher ratio in healthy (**Fig 3b**).  
152 Finally, there was also no consistent relationships between disease status and the relative  
153 abundance of Proteobacteria (**Fig 3c**). For all three measures, the pooled data did not show a  
154 significant difference between the healthy and diseased mice when tested using random effects  
155 models ( $p > 0.05$ ).

156

## 157 **Random Forest Models**

158           Given the significant PERMANOVA results, inconsistent alpha diversity metrics, and the  
159 success of statistical learning techniques in previous studies, we hypothesized that a random  
160 forest model would be able to discriminate between diseased and healthy mice (12, 43, 44). A  
161 random forest model works by building hundreds of decision trees, with a cut-off value  
162 (abundance) for a particular feature (taxon) being selected at each split to maximize the correct  
163 classification of the outcome (disease status) among the samples being used for training. For a  
164 new sample, the trees are used to classify it as diseased or healthy (45). Model performance in  
165 discrimination can be summarized using the area under the receiver operating curve (AUROC),  
166 with 0.5 being as good as random, and 1 being perfect prediction. We built a cross-validated  
167 random forest model on a randomly selected 70% of the samples, which yielded an AUROC of  
168 0.975. When this model was used to predict the remaining 30% of the samples, the AUROC was  
169 0.972, suggesting a lack of overfitting and the presence of a detectable microbial signature of  
170 disease across studies included in this analysis (**Fig 4a**).

171           To test the generalizability of this approach and whether the individual studies  
172 contributed complementary or unique information, we conducted a leave-one-out analysis. One  
173 by one, each study was left out, and the samples left out were predicted using a random forest  
174 classifier trained on the remaining set of samples (“n-1”). Furthermore, we assessed the cross-  
175 validated performance of the “n-1” classifiers, as well as that of models trained on the study left  
176 out and tested on the “n-1” set. The performance of the models varied greatly depending on  
177 which study was left out, as measured by the AUROC (**Fig 4b**). Samples from Lamas et al. (35),  
178 Laubitz et al. (19), and Yeom et al. (22) were perfectly predicted by models trained on all other  
179 samples, suggesting that they contained “overlapping” information. All other scenarios had



180 performance worse than the full model, with the Whitfield-Cargile et al. (36) samples having  
181 AUROC less than 0.5 (0.268). The worse-than-random prediction of the Whitefield-Cargile et al.  
182 samples suggests that it contributes information that runs counter to those in the other studies.  
183 Potential reasons for this are considered in the discussion. Assessing from the opposite direction,  
184 we also found great variability in the performance of models trained on one study and used to  
185 predict the rest. None of these had very high AUROC values, which is likely due to small sample  
186 sizes within each study. Indeed, He et al., Corsi et al. and Yeom et al. had few samples, and  
187 poorly predicted other studies. On the other hand, Lamas et al. performed well even with small  
188 sample sizes. Despite this variability, we found that removing one study did not change the  
189 overall model performance, as assessed by repeated cross-validation, with AUROC values  
190 staying consistently around 0.9 (**Fig 5**).

191

## 192 **Variable Selection and “Dysbiosis” Index**

193 As the overall random forest model had a robust predictive performance, we wanted to  
194 identify the taxons that contributed to this predictive power. To do this, we used the Boruta  
195 feature selection algorithm. This algorithm creates random probes (i.e. taxons with shuffled  
196 abundance values across samples), and tests their performance relative to the true features (i.e.  
197 taxons with observed abundance values). An iterative process retains only the taxons that are  
198 significantly better at prediction than their random counterparts (46). The algorithm yielded 184  
199 taxons that were confirmed as being important for disease status prediction, out of the total 1558  
200 tested (**Supplementary Table 1**). Ninety-eight of these had a higher mean abundance in mice  
201 with colitis (colitis-associated taxons), while 86 had a higher mean abundance in healthy mice  
202 (health-associated taxons). To narrow this list further in order to identify relevant taxons that

203 were the most prevalent, we only included ones that were present in half or more healthy (if  
204 health-associated) or colitis samples (if colitis-associated). This filtering retained 33 taxa, 12  
205 of which were colitis-associated, and 21 of which were health-associated (**Table 2**).

206 Most of the microbes (10 of 12) associated with the diseased state were members of the  
207 order Bacteroidales, including several species from the abundant but poorly understood S24-7  
208 family. However, microbes associated with the healthy state also included members of the order  
209 Bacteroidales (8 of 21) along with a number of Firmicutes (12 of 21 including *Lactobacilli* and  
210 *Clostridia sp.*) and one Actinobacteria (*Bifidobacteria*). These findings loosely align with the  
211 notion that there may be a bias towards a greater abundance of Firmicutes in the non-diseased  
212 state, and that *Lactobacilli* and *Bifidobacteria* may be markers of gut health (e.g. both are  
213 marketed as probiotics). As it relates to how different Bacteroidales species respond to  
214 inflammation and dysbiosis, however, there is clearly much that remains to be understood.

215 We hypothesized that the combined information contained in the relative abundances of  
216 this list of taxa was more relevant for disease status than the Shannon index, BF ratio or  
217 abundance of any one taxon. Thus, we created a “dysbiosis index”, which is the log transformed  
218 ratio of the relative abundances of colitis-associated taxa to health-associated taxa. When  
219 dysbiosis index values were calculated for each sample, we found significantly higher values for  
220 colitis samples in 8 studies (t-test,  $p < 0.05$ ). Two of the remaining had higher, non-significant  
221 mean values for mice with colitis, while one had a significantly higher value for healthy samples  
222 (**Fig 6**). A random effects model for the pooled data, with study as the random effect, indicated  
223 that mice with colitis had significantly higher dysbiosis index values, suggesting that this was a  
224 much better indicator of disease status than the other metrics (Shannon diversity index, B/F ratio,  
225 proteobacterial abundance) tested above.

226

## 227 **DISCUSSION**

228         Animal models, especially murine models, have been extensively used in research to  
229 understand human health and disease. For IBD in particular, a multitude of chemically induced,  
230 cell-transfer, and genetic models in mice have been used to understand aspects of intestinal  
231 immunology (18). More recently, there has been increasing interest in how the gut microbiota  
232 plays an important role in the onset of IBD in humans and colitis in these murine models. The  
233 prevalence of IBD in human populations and its murky etiology, combined with breakthroughs  
234 in microbiome research techniques, has fostered a plethora of studies investigating the role of the  
235 gut microbiota in this disease. Thus, these studies not only represent a potential for  
236 understanding the causes of IBD, but also the role of the microbiome more generally (47). Since  
237 it is difficult to interrogate causality and mechanisms of disease onset in humans, murine models  
238 provide such work, despite differences in some anatomical features, dietary habits and the  
239 microbiota.

240         In studying complex systems like microbiomes, where there are a nearly endless number  
241 of dimensions to be explored in terms of both membership and abundance, summary statistics  
242 that enable comparison along one dimension are often attractive. Alpha diversity metrics aim to  
243 summarize information regarding the how many members are present, as well as how evenly  
244 their abundances are distributed. Here we test the Shannon diversity index and find that even  
245 though individual studies can have significant results, they are not consistently in the same  
246 direction, and in the pooled data, there is no significant evidence of a relationship. Similarly, the  
247 BF ratio and Proteobacteria levels were also found to be inconsistent markers of gut health.  
248 Thus, while these one-dimensional metrics have the advantage of simplicity, they should be

249 employed with caution. Moreover, universal generalizations linking a diverse ecosystem to  
250 health may be unwarranted in this context.

251 Another frequently accepted principle is that the functional features of the microbiota can  
252 be usefully predicted from 16S level phylogenetic analysis at the family or genus level. Here,  
253 again, our study urges caution. While our analysis flagged an increase in specific Bacteroidales  
254 during inflammation as a common feature, other closely related Bacteroidales were reduced. Of  
255 particular interest are members of the S24-7 family, which are abundant members of the gut  
256 microbiota and yet are understudied and poorly understood and may play an important role in the  
257 resilience of the microbiota in the face of different abiotic stresses including osmotic-induced  
258 diarrhea (48). Given that different members of the S24-7 family were associated with either the  
259 disease or healthy state, the assumption that there is functional similarity between microbes at  
260 the phylum, family, or even genus level is an oversimplification that may prevent a more  
261 nuanced and complete understanding of the specific forces that shape the membership/abundance  
262 of gut microbial communities.

263 When analyzing high-dimensional data, the use of statistical learning techniques can be  
264 useful to “pick out” patterns that are not immediately observable – even from highly  
265 heterogenous datasets derived from different studies across multiple animal facilities. The  
266 results of our leave-one-out analyses indeed highlights the heterogeneity that exists between each  
267 of the studies. Given the relatively limited scope of our analysis, we were greatly encouraged by  
268 the very high predictive performance of our combined random forest model, which may suggest  
269 that there may indeed be some ‘universal’ microbial signatures that enable us to discriminate  
270 between healthy and diseased samples across multiple unrelated studies. It would be interesting  
271 to investigate what factors contribute to the observed heterogeneity between some studies,

272 especially after having relatively stringent inclusion criteria. This would only be feasible,  
273 however, if a much greater number of studies with available data and large samples sizes became  
274 available.

275 We note that one study chosen (Whitfield-Cargile) was a distinct outlier in our analysis  
276 from the other eleven studies. Unlike the other genetic and chemical models of dysbiosis  
277 included in this meta-analysis, the NSAID-induced inflammation in the Whitfield-Cargile study  
278 largely manifests in the distal jejunum and ileum and less the large intestine (i.e. it is not a true  
279 “colitis” *per se*). Furthermore, the trigger of dysbiosis used in that study, the NSAID  
280 indomethacin, is itself an anti-inflammatory agent that inhibits cyclooxygenase enzymes – which  
281 would further change the nature of the resulting inflammation. This indicates that care must be  
282 taken when comparing studies that may be superficially similar, but that have important  
283 differences in their underlying mechanisms or locations within the host. Accordingly, we  
284 believe the fact that the Whitfield-Cargile study performed differently than the other studies,  
285 indicates that the dysbiosis index derived from our meta-analysis is robust and able to distinguish  
286 colitis from other types of intestinal pathology.

287 The vast differences in the composition of the human and murine microbiota mean that  
288 translation between the two cannot be made directly in terms of individual microbes. On one  
289 hand, this means that it might require considerable effort in order to find any potential human  
290 counterpart of murine microbes causally implicated in colitis. On the other hand, this has meant  
291 that efforts to catalog the human gut microbiome has not helped much with cataloging the  
292 murine microbiome and robust human meta-analyses to synthesize evidence on the IBD-  
293 microbiome interaction cannot be readily used to guide future studies in mouse models.

294 In this context, the meta-analysis of animal studies can be useful. Generally, such studies are  
295 conducted for preclinical animal trials to select robust candidates for clinical trials, and prevent  
296 excessive replication (49, 50). However, animal meta-analyses can also play a valuable role in  
297 guiding research avenues in murine models of complex systems like microbiomes that are often  
298 studied at a macro-level, without a systematic approach to investigating host-microbe or  
299 microbe-microbe interactions at a micro level. In our meta-analysis, we find that simple metrics  
300 to summarize microbial diversity and composition may not be consistent; we also identify a  
301 microbial signature of disease that is relatively robust across studies, and report a list of microbes  
302 that may be good candidates for focused isolation and characterization efforts.

303 Most importantly, through the quantitative synthesis of published literature, we identified  
304 a number of organisms that seem to be consistently associated with health or disease in murine  
305 models of IBD. The colitis-associated microbes are likely to be good candidates for screening in  
306 mono-association or infection studies, whereas the healthy-associated ones are likely to be good  
307 candidates for probiotic studies. Many of the identified strains are phylotypes that are yet to be  
308 isolated. In a rapidly evolving field where mice microbiomes have been under increasing  
309 attention for systematic approaches to cataloguing and strain isolation, this study provides a tool  
310 that can be used to prioritize efforts.

311 Finally, our experience suggests that trying to standardize microbiome studies and make  
312 the data publicly accessible is of paramount importance. One of the main time-consuming steps  
313 in our analysis was the custom processing of datasets generated by a diversity of sequencing  
314 approaches, and the resolution of our taxonomic classification was limited by the diversity of  
315 16S primers used. While we identified 44 studies of interest for the meta-analysis, we were only  
316 able to obtain data from 12, suggesting that only a small fraction of published sequencing data is

317 actually deposited in a publicly accessible system. Journal policies on data-sharing can help  
318 rectify this.

319

## 320 **METHODS**

### 321 **Study Search and Inclusion**

322 To identify studies that investigated the murine intestinal microbiota in the context of  
323 intestinal inflammation, we conducted a systematic search of NCBI PubMed for articles that  
324 contained terms relating to microbiota, intestinal inflammation and murine models in the title and  
325 abstract, published between 2012 and 2016, and was not a review. We followed the preferred  
326 reporting items for systematic reviews and meta-analyses (PRISMA) guidelines to limit  
327 inclusion bias (51). The detailed search term was: “((microbiota[Title/Abstract] OR  
328 microbiome[Title/Abstract]) AND (colitis[Title/Abstract] OR (inflammation[Title/Abstract]  
329 AND (mucosa\*[Title/Abstract] OR epitheli\*[Title/Abstract] OR colon\*[Title/Abstract] OR  
330 gut[Title/Abstract] OR intestin\*[Title/Abstract]))) AND ("2012/01/01"[PDAT] :  
331 "2016/12/30"[PDAT]) AND (mice[Title/Abstract] OR mouse[Title/Abstract] OR  
332 murine[Title/Abstract]) NOT review[Publication Type]”. We screened the title and abstracts of  
333 816 articles yielded by the search for eligibility. In addition, we obtained three studies from  
334 knowledge of published literature, and a currently unpublished dataset of an IL-10 knockout  
335 model of colitis from a collaborator.

336 Seventy-nine full-text articles were then assessed, and 44 were retained to be checked for  
337 data availability. Ten studies had read files accessible in Sequence Read Archive, European  
338 Nucleotide Archive, MG-RAST or personal collaboration; 32 studies had no publicly available  
339 data or metadata, and only two provided access to data by the time of publication after contact.

340 Studies were excluded if they: did not do a 16S sequence-based analysis of the microbiome; used  
341 a synthetic microbiota (e.g. Altered Schaedler Flora, humanized); only had outcomes of low-  
342 grade inflammation or aging associated “inflammaging”; used pathogenic infection for  
343 inflammation; used bacterial treatment (e.g. probiotics); used antibiotic treatment; used non-  
344 murine models; did not have an outcome of colonic inflammation; did not have non-colitis  
345 controls; was not a primary article; or that failed to assess the microbiota before onset of  
346 inflammation. We had the final exclusion criteria because many studies aim to answer the  
347 question of whether a particular microbiota is associated with increased susceptibility to colitis;  
348 however, we were interested in a microbial signature associated with the *onset* of colitis. We  
349 retained articles if they contained a subset of samples that were eligible, contingent on non-  
350 colitis controls being present. Within the included studies, we excluded any samples that met  
351 relevant exclusion criteria outlined above (e.g. low-grade inflammation, antibiotic treatment).

352

### 353 **Data Processing**

354 For each study, we used a standardized bioinformatics pipeline to generate counts for  
355 taxonomic groups. Quality filtering criteria was determined on a study-by-study basis depending  
356 on the sequencing platform used and inspection of read quality (52, 53). Reads were filtered and  
357 resolved to amplicon sequence variants (ASVs) using the DADA2 pipeline. The advantage of  
358 using DADA2 over traditional clustering methods is that it resolves differences of as little as one  
359 nucleotide to determine exact sequences based on an error model for the sequencing run (54).  
360 Resolved paired-end sequences were merged where applicable, chimeras removed and a RSV-  
361 abundance tables built (equivalent to OTU-tables).



362 RSVs were assigned microbial taxonomies using a custom R script (55). Sequences were  
363 searched against the EZTaxon database (January 2017 Update) (30) using vsearch (56) and  
364 assigned the taxonomy (up to species level) of the highest identity match >97%. Tied hits were  
365 assigned ambiguous classification (e.g. Shigella/Escherichia). Use of EZTaxon allows  
366 classification of uncultured bacteria because it has unique identifiers assigned to manually  
367 curated phylotypes. RSVs classified as “Streptophyta” at phylum level were filtered out. RSV  
368 counts were standardized by calculating relative abundances. Within each study, RSVs that did  
369 not make up more than 0.2% of the community in at least one sample, as well as taxonomic  
370 groups that were detectable in only one sample, were removed.

371 To enable merging of datasets from different studies, that used different 16S regions,  
372 RSVs unclassified at the species level were removed. Next, RSV abundance tables were  
373 collapsed to the highest taxonomic resolution possible (e.g. x/y from one study was collapsed  
374 into x/y/z group if another study could not resolve between x/y/z). Data handling, merging and  
375 filtering was done using the phyloseq package (57).

376

### 377 **Alpha and Beta Diversity Analysis**

378 For each sample, we estimated the Shannon diversity index using the vegan package (58),  
379 as well as the ratio of Bacteroidetes abundance to Firmicutes abundance (BF ratio). Following  
380 normalizing transformations, t-tests were used to detect significant differences between healthy  
381 and mice with colitis, within each study. For the pooled data, a linear random effects model  
382 (implemented using the lme4 package (59)) with random slopes and intercepts was used to  
383 determine if there was a statistically significant association between the measures and disease  
384 status.

385 Diversity across samples was investigated using Principal Coordinates Analysis (PCoA)  
386 and permutational analysis of variance (PERMANOVA) (adonis function; 999 permutations)  
387 using the vegan package. This was done separately for each study, as well as the pooled data.

388

### 389 **Random Forest Models**

390 A random forest (RF) model was built with the pooled data using the caret package (60)  
391 (10-fold cross validated, repeated 5 times; 250 trees), and area under the receiver operating  
392 characteristic curve (AUROC) was used to assess model performance in discriminating healthy  
393 from diseased mice. To investigate the generalizability of using RF models, we conducted a  
394 leave-one-out analysis, repeatedly building models on data from n-1 studies, and testing model  
395 performance in predicting the study left out, using AUROC.

396

### 397 **Variable Selection and “Dysbiosis” Index**

398 To identify which taxonomic groups are most important in discriminating between  
399 healthy and diseased mice within a random forest framework, the Boruta feature selection  
400 algorithm was used with 500 runs using the Boruta package (46). Next, the selected taxa were  
401 labelled as being associated with healthy or diseased status based on whether they had higher  
402 mean abundance in healthy or diseased mice, respectively (statistical significance not  
403 considered). This labelled list was pruned to contain only taxa present in 50% of diseased or  
404 healthy mice. The dysbiosis index was calculated by log transforming the ratio of the colitis-  
405 associated taxa to the health-associated taxa.

406 As with the alpha diversity metrics, within each study, t-tests were used to determine the  
407 utility of the index in discriminating between healthy and diseased mice, and a similar random  
408 effects model was used for the pooled data.

409 All data was visualized using the ggplot2 package (61).

410

## 411 **ACKNOWLEDGEMENTS**

412 We want to thank all the authors who ensured that their data was publicly available or shared the  
413 data upon request. This work was funded by the Canadian Institutes of Health Research (CIHR  
414 grant 144628).

415 We also wish to acknowledge this land on which the University of Toronto operates. For  
416 thousands of years it has been the traditional land of the Huron-Wendat, the Seneca, and most  
417 recently, the Mississaugas of the Credit River. Today, this meeting place is still the home to  
418 many Indigenous people from across Turtle Island and we are grateful to have the opportunity to  
419 work on this land.

420

## 421 **REFERENCES**

- 422 1. Marchesi JR, Ravel J. 2015. The vocabulary of microbiome research: a proposal.  
423 *Microbiome* 3:31.
- 424 2. Flint HJ, Scott KP, Duncan SH, Louis P, Forano E. 2012. Microbial degradation of complex  
425 carbohydrates in the gut. *Gut Microbes* 3:289–306.
- 426 3. Tremaroli V, Bäckhed F. 2012. Functional interactions between the gut microbiota and host  
427 metabolism. *Nature* 489:242–249.

- 428 4. Round JL, Mazmanian SK. 2009. The gut microbiota shapes intestinal immune responses  
429 during health and disease. *Nat Rev Immunol* 9:313–323.
- 430 5. Petersen C, Round JL. 2014. Defining dysbiosis and its influence on host immunity and  
431 disease. *Cell Microbiol* 16:1024–1033.
- 432 6. Kostic AD, Xavier RJ, Gevers D. 2014. The Microbiome in Inflammatory Bowel Disease:  
433 Current Status and the Future Ahead. *Gastroenterology* 146:1489–1499.
- 434 7. Shanahan F. 2002. Crohn’s disease. *Lancet Lond Engl* 359:62–69.
- 435 8. Farrell RJ, Peppercorn MA. 2002. Ulcerative colitis. *Lancet Lond Engl* 359:331–340.
- 436 9. Jovel J, Patterson J, Wang W, Hotte N, O’Keefe S, Mitchel T, Perry T, Kao D, Mason AL,  
437 Madsen KL, others. 2016. Characterization of the Gut Microbiome Using 16S or Shotgun  
438 Metagenomics. *Front Microbiol* 7.
- 439 10. Hiergeist A, Reischl U, Gessner A. 2016. Multicenter quality assessment of 16S ribosomal  
440 DNA-sequencing for microbiome analyses reveals high inter-center variability. *Int J Med*  
441 *Microbiol* 306:334–342.
- 442 11. Walters WA, Xu Z, Knight R. 2014. Meta-analyses of human gut microbes associated with  
443 obesity and IBD. *FEBS Lett* 588:4223–4233.
- 444 12. Shah MS, DeSantis TZ, Weinmaier T, McMurdie PJ, Cope JL, Altrichter A, Yamal J-M,  
445 Hollister EB. 2017. Leveraging sequence-based faecal microbial community survey data to  
446 identify a composite biomarker for colorectal cancer. *Gut* gutjnl–2016.
- 447 13. Sze MA, Schloss PD. 2016. Looking for a signal in the noise: revisiting obesity and the  
448 microbiome. *MBio* 7:e01018–16.
- 449 14. Hugenholtz F, de Vos WM. 2018. Mouse models for human intestinal microbiota research: a  
450 critical evaluation. *Cell Mol Life Sci* 75:149–160.

- 451 15. Hörmannspurger G, Schaubeck M, Haller D. 2015. Intestinal Microbiota in Animal Models  
452 of Inflammatory Diseases. *ILAR J* 56:179–191.
- 453 16. Hildebrand F, Nguyen TLA, Brinkman B, Yunta RG, Cauwe B, Vandenabeele P, Liston A,  
454 Raes J. 2013. Inflammation-associated enterotypes, host genotype, cage and inter-individual  
455 effects drive gut microbiota variation in common laboratory mice. *Genome Biol* 14:R4.
- 456 17. Kiesler P, Fuss IJ, Strober W. 2015. Experimental models of inflammatory bowel diseases.  
457 *Cell Mol Gastroenterol Hepatol* 1:154–170.
- 458 18. Mizoguchi A. 2012. Animal models of inflammatory bowel disease, p. 263–320. *In Progress*  
459 in molecular biology and translational science. Elsevier.
- 460 19. Laubitz D, Harrison CA, Midura-Kiela MT, Ramalingam R, Larmonier CB, Chase JH,  
461 Caporaso JG, Besselsen DG, Ghishan FK, Kiela PR. 2016. Reduced epithelial Na<sup>+</sup>/H<sup>+</sup>  
462 exchange drives gut microbial dysbiosis and promotes inflammatory response in T cell-  
463 mediated murine colitis. *PloS One* 11:e0152044.
- 464 20. Moschen AR, Gerner RR, Wang J, Klepsch V, Adolph TE, Reider SJ, Hackl H, Pfister A,  
465 Schilling J, Moser PL, Kempster SL, Swidsinski A, Orth Höller D, Weiss G, Baines JF,  
466 Kaser A, Tilg H. 2016. Lipocalin 2 Protects from Inflammation and Tumorigenesis  
467 Associated with Gut Microbiota Alterations. *Cell Host Microbe* 19:455–469.
- 468 21. Berry D, Schwab C, Milinovich G, Reichert J, Mahfoudh KB, Decker T, Engel M, Hai B,  
469 Hainzl E, Heider S, others. 2012. Phylotype-level 16S rRNA analysis reveals new bacterial  
470 indicators of health state in acute murine colitis. *ISME J* 6:2091–2106.
- 471 22. Yeom Y, Kim B-S, Kim S-J, Kim Y. 2016. *Sasa quelpaertensis* leaf extract regulates  
472 microbial dysbiosis by modulating the composition and diversity of the microbiota in dextran  
473 sulfate sodium-induced colitis mice. *BMC Complement Altern Med* 16:303.

- 474 23. Dziarski R, Park SY, Kashyap DR, Dowd SE, Gupta D. 2016. Pglyrp-Regulated Gut  
475 Microflora *Prevotella falsenii*, *Parabacteroides distasonis* and *Bacteroides eggerthii* Enhance  
476 and *Alistipes finegoldii* Attenuates Colitis in Mice. *PLoS One* 11:e0146162.
- 477 24. Sokol H, Pigneur B, Watterlot L, Lakhdari O, Bermúdez-Humarán LG, Gratadoux J-J,  
478 Blugeon S, Bridonneau C, Furet J-P, Corthier G. 2008. *Faecalibacterium prausnitzii* is an  
479 anti-inflammatory commensal bacterium identified by gut microbiota analysis of Crohn  
480 disease patients. *Proc Natl Acad Sci* 105:16731–16736.
- 481 25. Nell S, Suerbaum S, Josenhans C. 2010. The impact of the microbiota on the pathogenesis of  
482 IBD: lessons from mouse infection models. *Nat Rev Microbiol* 8:564.
- 483 26. Gkouskou K, Deligianni C, Tsatsanis C, Eliopoulos AG. 2014. The gut microbiota in mouse  
484 models of inflammatory bowel disease. *Front Cell Infect Microbiol* 4.
- 485 27. Xiao L, Feng Q, Liang S, Sonne SB, Xia Z, Qiu X, Li X, Long H, Zhang J, Zhang D. 2015.  
486 A catalog of the mouse gut metagenome. *Nat Biotechnol* 33:1103.
- 487 28. Lagkouvardos I, Pukall R, Abt B, Foesel BU, Meier-Kolthoff JP, Kumar N, Bresciani A,  
488 Martínez I, Just S, Ziegler C. 2016. The Mouse Intestinal Bacterial Collection (miBC)  
489 provides host-specific insight into cultured diversity and functional potential of the gut  
490 microbiota. *Nat Microbiol* 1:16131.
- 491 29. Callahan BJ, McMurdie PJ, Holmes SP. 2017. Exact sequence variants should replace  
492 operational taxonomic units in marker-gene data analysis. *ISME J* 11:2639–2643.
- 493 30. Kim O-S, Cho Y-J, Lee K, Yoon S-H, Kim M, Na H, Park S-C, Jeon YS, Lee J-H, Yi H,  
494 Won S, Chun J. 2012. Introducing EzTaxon-e: a prokaryotic 16S rRNA gene sequence  
495 database with phylotypes that represent uncultured species. *Int J Syst Evol Microbiol*  
496 62:716–721.

- 497 31. Shin N-R, Whon TW, Bae J-W. 2015. Proteobacteria: microbial signature of dysbiosis in gut  
498 microbiota. *Trends Biotechnol* 33:496–503.
- 499 32. Moher D, Liberati A, Tetzlaff J, Altman DG, Group TP. 2009. Preferred Reporting Items for  
500 Systematic Reviews and Meta-Analyses: The PRISMA Statement. *PLOS Med* 6:e1000097.
- 501 33. Jacobs JP, Lin L, Goudarzi M, Ruegger P, McGovern DP, Fornace Jr AJ, Borneman J, Xia  
502 L, Braun J. 2016. Microbial, metabolomic, and immunologic dynamics in a relapsing genetic  
503 mouse model of colitis induced by T-synthase deficiency. *Gut Microbes* 00–00.
- 504 34. Chassaing B, Koren O, Goodrich JK, Poole AC, Srinivasan S, Ley RE, Gewirtz AT. 2015.  
505 Dietary emulsifiers impact the mouse gut microbiota promoting colitis and metabolic  
506 syndrome. *Nature* 519:92.
- 507 35. Lamas B, Richard ML, Leducq V, Pham H-P, Michel M-L, Da Costa G, Bridonneau C,  
508 Jegou S, Hoffmann TW, Natividad JM, others. 2016. CARD9 impacts colitis by altering gut  
509 microbiota metabolism of tryptophan into aryl hydrocarbon receptor ligands. *Nat Med*  
510 22:598–605.
- 511 36. Whitfield-Cargile CM, Cohen ND, Chapkin RS, Weeks BR, Davidson LA, Goldsby JS, Hunt  
512 CL, Steinmeyer SH, Menon R, Suchodolski JS, others. 2016. The microbiota-derived  
513 metabolite indole decreases mucosal inflammation and injury in a murine model of NSAID  
514 enteropathy. *Gut Microbes* 1–16.
- 515 37. Sassone-Corsi M, Nuccio S-P, Liu H, Hernandez D, Vu CT, Takahashi AA, Edwards RA,  
516 Raffatellu M. 2016. Microcins mediate competition among Enterobacteriaceae in the  
517 inflamed gut. *Nature* 540:280–283.
- 518 38. Vereecke L, Vieira-Silva S, Billiet T, van Es JH, Mc Guire C, Slowicka K, Sze M, van den  
519 Born M, De Hertogh G, Clevers H, Raes J, Rutgeerts P, Vermeire S, Beyaert R, van Loo G.

- 520 2014. A20 controls intestinal homeostasis through cell-specific activities. *Nat Commun*  
521 5:5103.
- 522 39. He Q, Li X, Liu C, Su L, Xia Z, Li X, Li Y, Li L, Yan T, Feng Q, others. 2016. Dysbiosis of  
523 the fecal microbiota in the TNBS-induced Crohn's disease mouse model. *Appl Microbiol*  
524 *Biotechnol* 100:4485–4494.
- 525 40. Goodrich JK, Di Rienzi SC, Poole AC, Koren O, Walters WA, Caporaso JG, Knight R, Ley  
526 RE. 2014. Conducting a microbiome study. *Cell* 158:250–262.
- 527 41. Bray JR, Curtis JT. 1957. An ordination of the upland forest communities of southern  
528 Wisconsin. *Ecol Monogr* 27:325–349.
- 529 42. Anderson MJ. 2005. PERMANOVA: a FORTRAN computer program for permutational  
530 multivariate analysis of variance. *Dep Stat Univ Auckl N Z* 24.
- 531 43. Duvallat C, Gibbons SM, Gurry T, Irizarry RA, Alm EJ. 2017. Meta-analysis of gut  
532 microbiome studies identifies disease-specific and shared responses. *Nat Commun* 8:1784.
- 533 44. Vázquez-Baeza Y, Hyde ER, Suchodolski JS, Knight R. 2016. Dog and human inflammatory  
534 bowel disease rely on overlapping yet distinct dysbiosis networks. *Nat Microbiol* 1:16177.
- 535 45. Breiman L. 2001. Random forests. *Mach Learn* 45:5–32.
- 536 46. Kursa MB, Rudnicki WR. 2010. Feature selection with the Boruta package. *J Stat Softw*  
537 36:1–13.
- 538 47. Huttenhower C, Kostic AD, Xavier RJ. 2014. Inflammatory Bowel Disease as a Model for  
539 Translating the Microbiome. *Immunity* 40:843–854.
- 540 48. Tropini C, Moss EL, Merrill BD, Ng KM, Higginbottom SK, Casavant EP, Gonzalez CG,  
541 Fremin B, Bouley DM, Elias JE, Bhatt AS, Huang KC, Sonnenburg JL. 2018. Transient



- 542 Osmotic Perturbation Causes Long-Term Alteration to the Gut Microbiota. *Cell* 173:1742–  
543 1754.e17.
- 544 49. Vesterinen HM, Sena ES, Egan KJ, Hirst TC, Churolov L, Currie GL, Antonic A, Howells  
545 DW, Macleod MR. 2014. Meta-analysis of data from animal studies: a practical guide. *J*  
546 *Neurosci Methods* 221:92–102.
- 547 50. Hooijmans CR, IntHout J, Ritskes-Hoitinga M, Rovers MM. 2014. Meta-analyses of animal  
548 studies: an introduction of a valuable instrument to further improve healthcare. *ILAR J*  
549 55:418–426.
- 550 51. Liberati A, Altman DG, Tetzlaff J, Mulrow C, Gøtzsche PC, Ioannidis JPA, Clarke M,  
551 Devereaux PJ, Kleijnen J, Moher D. 2009. The PRISMA Statement for Reporting Systematic  
552 Reviews and Meta-Analyses of Studies That Evaluate Health Care Interventions:  
553 Explanation and Elaboration. *PLOS Med* 6:e1000100.
- 554 52. Callahan BJ, Sankaran K, Fukuyama JA, McMurdie PJ, Holmes SP. 2016. Bioconductor  
555 workflow for microbiome data analysis: from raw reads to community analyses.  
556 *F1000Research* 5:1492.
- 557 53. Callahan B. DADA2 Pipeline Tutorial (1.8).
- 558 54. Callahan BJ, McMurdie PJ, Rosen MJ, Han AW, Johnson AJA, Holmes SP. 2016. DADA2:  
559 High-resolution sample inference from Illumina amplicon data. *Nat Methods* 13:581–583.
- 560 55. Team RC. 2014. R: A language and environment for statistical computing. R Foundation for  
561 Statistical Computing, Vienna, Austria. 2013.
- 562 56. Rognes T, Flouri T, Nichols B, Quince C, Mahé F. 2016. VSEARCH: a versatile open source  
563 tool for metagenomics. *PeerJ* 4:e2584.

- 564 57. McMurdie PJ, Holmes S. 2013. phyloseq: An R Package for Reproducible Interactive  
565 Analysis and Graphics of Microbiome Census Data. PLOS ONE 8:e61217.
- 566 58. Oksanen J, Kindt R, Legendre P, O'Hara B, Stevens MHH, Oksanen MJ, Suggests M. 2007.  
567 The vegan package. Community Ecol Package 10:631–637.
- 568 59. Bates D, Mächler M, Bolker B, Walker S. 2014. Fitting linear mixed-effects models using  
569 lme4. ArXiv Prepr ArXiv14065823.
- 570 60. Kuhn M. 2008. Caret package. J Stat Softw 28:1–26.
- 571 61. Wickham H. 2010. ggplot2: elegant graphics for data analysis. J Stat Softw 35:65–88.
- 572

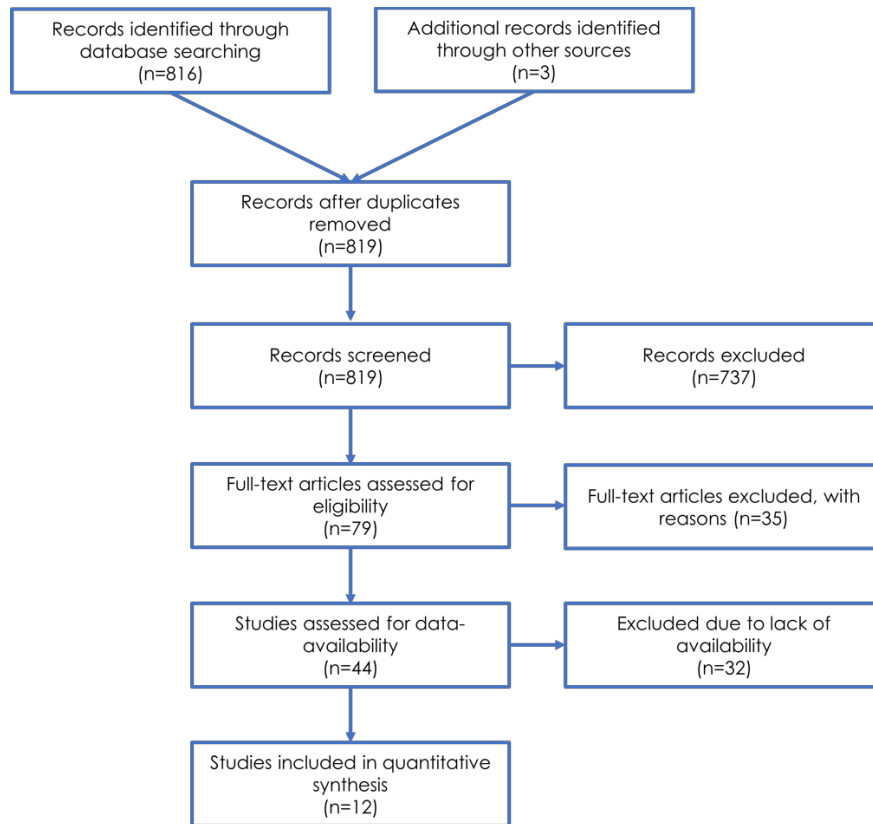

573

574 **FIG 1:** Flow diagram of literature search and review for inclusion in meta-analysis, represented

575 according to PRISMA guidelines.

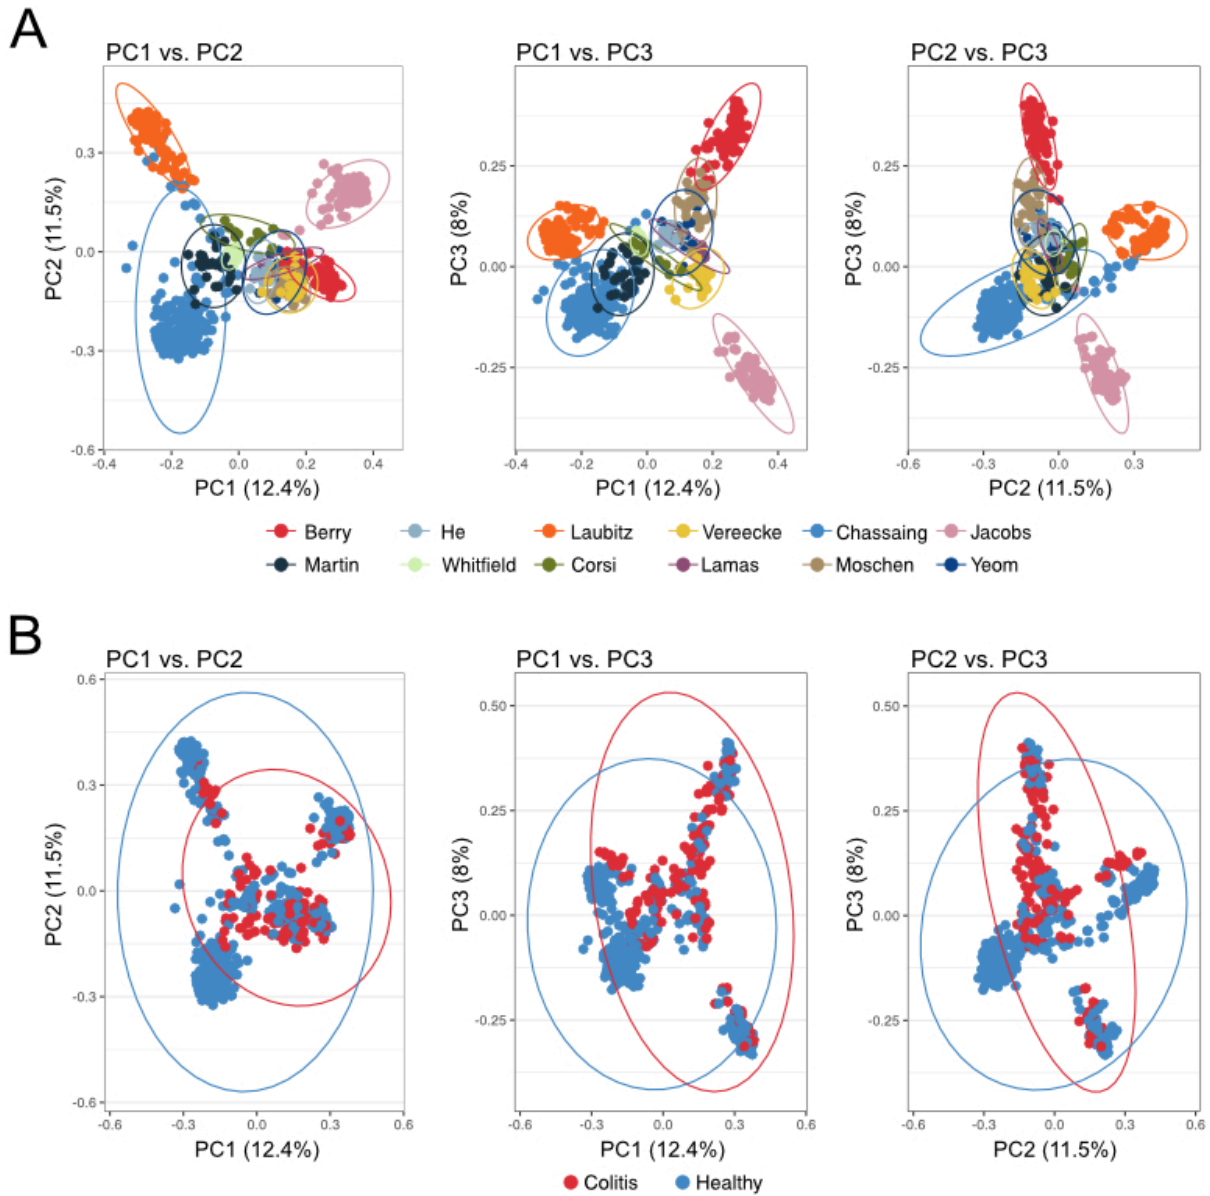

576

577 **FIG 2:** Principle Coordinates Analysis (PCoA) plots depicting the relationships between sample  
578 microbial compositions along the first three principal coordinates. Colored points and the  
579 associated ellipses distinguish between the different studies/datasets (A) or disease status (B).

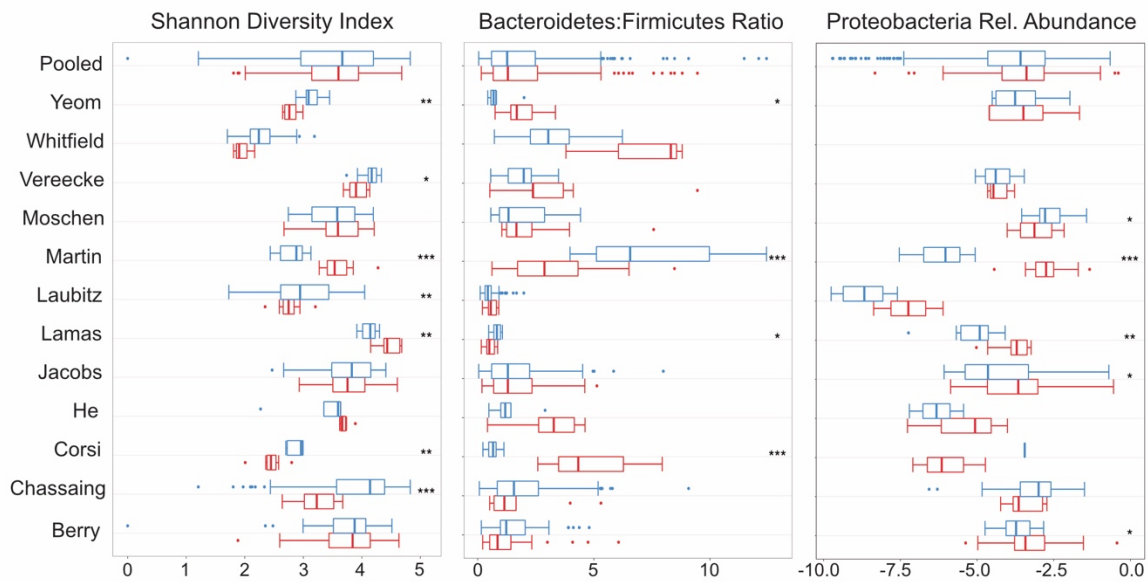

580

581 **FIG 3:** Boxplots of commonly used diversity and composition metrics. From left, each panel  
582 shows distribution and statistical significance of Shannon Diversity Index, Bacteroidetes-  
583 Firmicutes Ratio and Relative Abundance of Proteobacteria, within each study and for pooled  
584 samples. Blue represents healthy samples and red represents colitic samples. \* =  $p < 0.05$ , \*\* =  $p$   
585  $< 0.01$ , \*\*\* =  $p < 0.001$ .

586

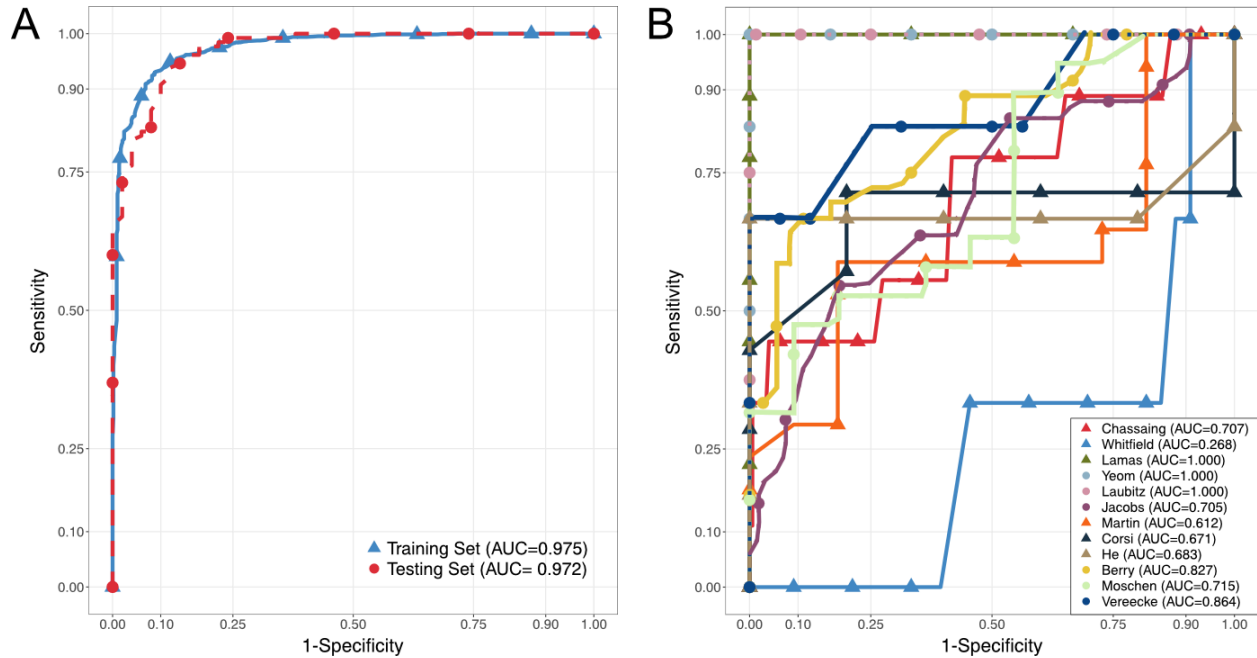

587

588 **FIG 4:** Receiver-Operator Curves demonstrating predictive performance of Random Forest  
589 Models, with Area-Under the Curves (AUC) reported. (A) shows cross-validated performance on  
590 training set consisting of a random 70% of all samples (blue) and performance on remaining  
591 30% of samples in the testing set (red). (B) shows performance of models trained on (n-1)  
592 studies on the study that was left out. Each color-shape and name in the legend refers to the study  
593 that was left out of, and predicted by, the model.

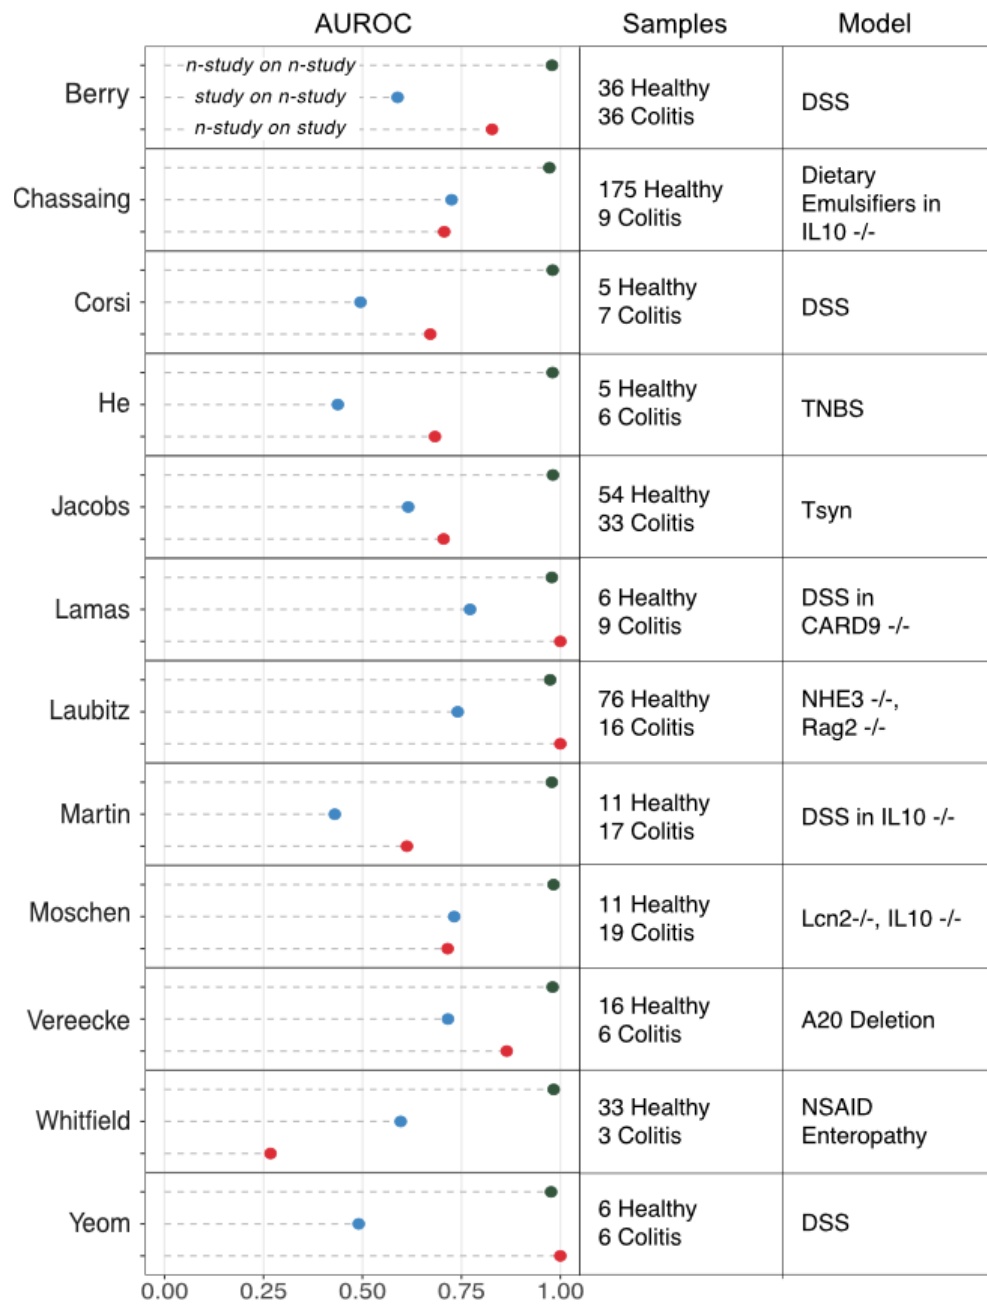

594

595 **FIG 5:** Summary of model performances in terms of Area Under the Receiver-Operator Curve  
 596 (AUROC) and characteristics for each study. The top line (green) shows cross-validated  
 597 performance of model when the named study was left out (e.g. for first panel, cross-validated  
 598 AUROC for model with all studies except Berry et al.). The second line (blue) shows

599 performance of model trained on named study on predicting all other studies (for first panel,  
600 AUROC for model trained on Berry et al. and tested on all studies except Berry et al.). The third  
601 line (red) shows performance of model trained on all studies except the named one, on predicting  
602 the named one (for first panel, AUROC for model trained on all studies except Berry et al. and  
603 tested on Berry et al.).

604

605



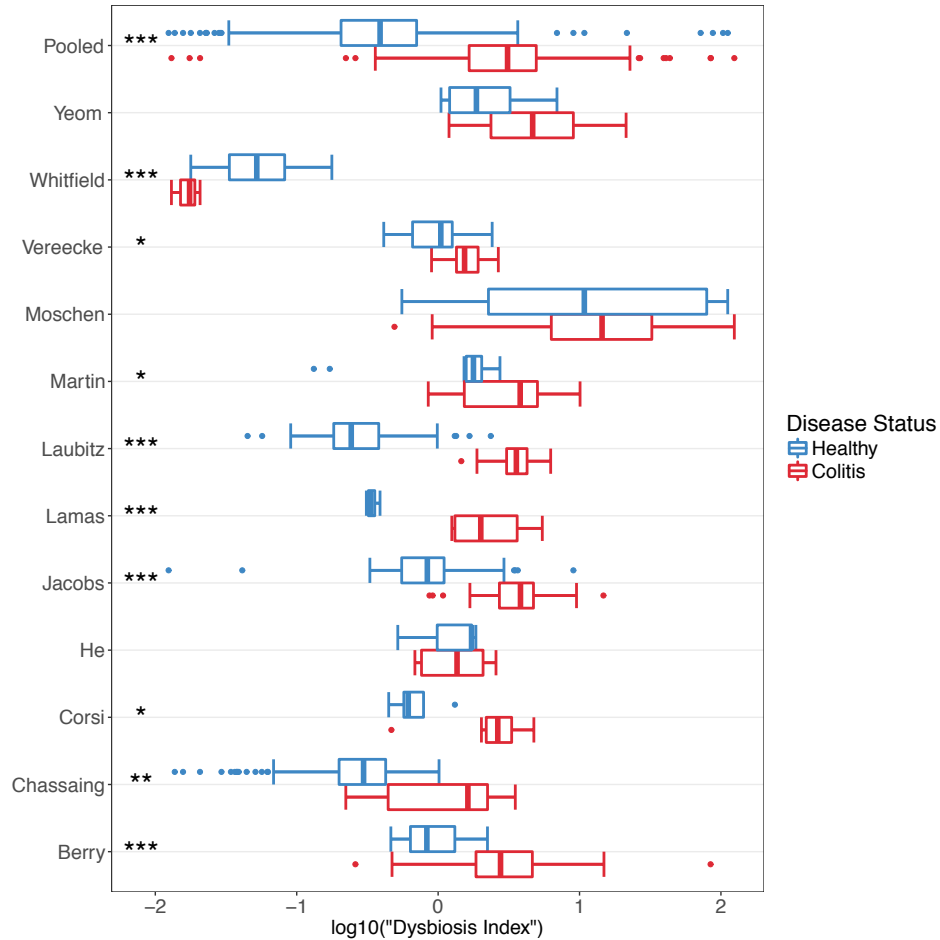

606

607 **FIG 6:** Boxplots showing distribution and statistical significance of “dysbiosis index” within  
608 each study and for pooled samples. Blue represents healthy samples and red represents colitic  
609 samples. \* =  $p < 0.05$ , \*\* =  $p < 0.01$ , \*\*\* =  $p < 0.001$ .

610

| Study, Year                         | Title                                                                                                                                                            | Colitis Model                             | Mouse Strains | DNA extraction                        | Region | Platform       | Biological Source          | Sample counts            | Data Source                   |
|-------------------------------------|------------------------------------------------------------------------------------------------------------------------------------------------------------------|-------------------------------------------|---------------|---------------------------------------|--------|----------------|----------------------------|--------------------------|-------------------------------|
| Jacobs et al. 2017 <sup>19</sup>    | Microbial, metabolomic, and immunologic dynamics in a relapsing genetic mouse model of colitis induced by T-synthase deficiency.                                 | Tsyn mice (C1galt1 or T-synthase deleted) | C57BL/6       | MO Bio PowerSoil DNA Isolation Kit    | V4     | Illumina HiSeq | Intestinal lavage and wash | 54 Healthy<br>33 Colitis | Public, PRJNA318692           |
| Chassaing et al. 2015 <sup>20</sup> | Dietary emulsifiers impact the mouse gut microbiota promoting colitis and metabolic syndrome.                                                                    | Dietary emulsifiers in IL10-/- mice       | C57BL/6       | MO Bio PowerSoil DNA Isolation Kit    | V4     | Illumina MiSeq | Fecal Samples              | 175 Healthy<br>9 Colitis | Public, PRJEB8035             |
| Laubitz et al. 2016 <sup>21</sup>   | Reduced Epithelial Na <sup>+</sup> /H <sup>+</sup> Exchange Drives Gut Microbial Dysbiosis and Promotes Inflammatory Response in T Cell-Mediated Murine Colitis. | NHE3-/-, Rag2-/-                          | 129S6/SvEv    | Beads + Proteinase, Phenol-chloroform | V4     | Illumina MiSeq | Fecal Samples              | 76 Healthy<br>16 Colitis | Public, 10.17605/OSF.IO/UWFAP |
| Yeom et al. 2016 <sup>22</sup>      | Sasa quelpaertensis leaf extract regulates microbial dysbiosis by modulating the composition and                                                                 | DSS                                       | C57BL/6       | Fast DNA SPIN Kits                    | V1-V3  | Roche 454      | Fecal samples              | 6 Healthy<br>6 Colitis   | Public, PRJEB13815            |

|                                             |                                                                                                                            |                                  |                              |                                    |       |                |               |                          |                        |
|---------------------------------------------|----------------------------------------------------------------------------------------------------------------------------|----------------------------------|------------------------------|------------------------------------|-------|----------------|---------------|--------------------------|------------------------|
|                                             | diversity of the microbiota in dextran sulfate sodium-induced colitis mice.                                                |                                  |                              |                                    |       |                |               |                          |                        |
| Lamas et al. 2016 <sup>32</sup>             | CARD9 impacts colitis by altering gut microbiota metabolism of tryptophan into aryl hydrocarbon receptor ligands.          | DSS in CARD9 <sup>-/-</sup> mice | C57BL/6J                     | Beads in FastPrep, isopropanol.    | V3-V4 | Illumina MiSeq | Fecal samples | 6 Healthy<br>9 Colitis   | Public,<br>PRJEB9079   |
| Whitfield-Cargile et al. 2016 <sup>33</sup> | The microbiota-derived metabolite indole decreases mucosal inflammation and injury in a murine model of NSAID enteropathy. | NSAID (indomethacin)             | C57BL/6J                     | MO Bio PowerSoil DNA Isolation Kit | V4    | Illumina MiSeq | Fecal samples | 33 Healthy<br>3 Colitis  | Public,<br>PRJNA290483 |
| Martin, unpublished                         | Experiments showing IL10 <sup>-/-</sup> deletion caused spontaneous colitis in some mouse cages but not others             | DSS in IL10 <sup>-/-</sup> mice  | C57BL/6                      | DNA from soil kit (Macherey-Nagel) | V4    | Illumina MiSeq | Fecal samples | 11 Healthy<br>17 Colitis | Request                |
| Sassone-Corsi et al. 2016 <sup>34</sup>     | Microcins mediate competition among Enterobacteriaceae in the inflamed gut.                                                | DSS                              | C57BL/6 Slc11a1 <sup>+</sup> | QIAamp DNA Stool Kit               | V4    | Illumina MiSeq | Fecal samples | 5 Healthy<br>7 Colitis   | Public,<br>PRJEB15700  |

|                                    |                                                                                                      |                                           |          |                                            |       |                 |                                 |                          |                   |
|------------------------------------|------------------------------------------------------------------------------------------------------|-------------------------------------------|----------|--------------------------------------------|-------|-----------------|---------------------------------|--------------------------|-------------------|
| Moschen et al. 2016 <sup>35</sup>  | Lipocalin 2 protects from inflammation and tumorigenesis associated with gut microbiota alterations. | Lcn2 <sup>-/-</sup> , IL10 <sup>-/-</sup> | C57BL/6J | FastDNA SPIN Kit, Precellys 24 homogenizer | V1-V2 | Illumina MiSeq  | Cecal content                   | 11 Healthy<br>19 Colitis | Public, ERP014639 |
| Berry et al. 2015 <sup>36</sup>    | Intestinal microbiota signatures associated with mice experiencing recurring colitis.                | DSS                                       | C57BL/6  | Phenol-chloroform, bead                    | V6-V9 | Roche 454       | Intestinal flush, fecal samples | 36 Healthy<br>36 Colitis | Request           |
| Vereecke et al. 2014 <sup>37</sup> | A20 controls intestinal homeostasis through cell-specific activities.                                | A20 deletion                              | C57BL/6  | QIAamp DNA Stool Mini Kit                  | V3-V5 | Roche 454       | Cecal content                   | 16 Healthy<br>6 Colitis  | Request           |
| He et al. 2016 <sup>38</sup>       | Dysbiosis of the fecal microbiota in the TNBS-induced Crohn's disease mouse model                    | TNBS                                      | BALB/c   | Phenol-chloroform, bead                    | V5-V4 | Ion Torrent PGM | Fecal samples                   | 5 Healthy<br>6 Colitis   | Public, ERP011541 |

**TABLE 1** Summary of studies included in the meta-analysis. DSS = Dextran Sulfate Sodium, IL10 = Interleukin 10, NSAID = Non-Steroidal Anti-Inflammatory Drug, TNBS = 2,4,6-trinitrobenzene sulfonic acid.

| Median Importance | Phylum        | Class       | Order           | Family                          | Genus                                                       | Species                                                                                                                                                                                                                                                                                                                                                                                                                                                                                                                                                                                                                                                                                                                        | EZTaxon ID                                                                                                                                                                                                                                                                                                                                                                                                      | Associated Status | Proportion Present |
|-------------------|---------------|-------------|-----------------|---------------------------------|-------------------------------------------------------------|--------------------------------------------------------------------------------------------------------------------------------------------------------------------------------------------------------------------------------------------------------------------------------------------------------------------------------------------------------------------------------------------------------------------------------------------------------------------------------------------------------------------------------------------------------------------------------------------------------------------------------------------------------------------------------------------------------------------------------|-----------------------------------------------------------------------------------------------------------------------------------------------------------------------------------------------------------------------------------------------------------------------------------------------------------------------------------------------------------------------------------------------------------------|-------------------|--------------------|
| 8.467             | Firmicutes    | Clostridia  | Clostridiales   | Lachnospiraceae                 | AB626912_g                                                  | EU452880_s                                                                                                                                                                                                                                                                                                                                                                                                                                                                                                                                                                                                                                                                                                                     | 107581                                                                                                                                                                                                                                                                                                                                                                                                          | Healthy           | 0.502              |
| 7.015             | Bacteroidetes | Bacteroidia | Bacteroidales   | S24-7_f                         | HM124280_g                                                  | EF603706_s                                                                                                                                                                                                                                                                                                                                                                                                                                                                                                                                                                                                                                                                                                                     | 103736                                                                                                                                                                                                                                                                                                                                                                                                          | Healthy           | 0.829              |
| 6.873             | Firmicutes    | Bacilli     | Lactobacillales | Lactobacillaceae                | Lactobacillus                                               | Lactobacillus_gallinarum/Lactobacillus_hamsteri/Lactobacillus_kitasatonis/Lactobacillus_acidophilus/Lactobacillus_gasserii/Lactobacillus_ultunensis/Lactobacillus_helveticus/Lactobacillus_johnsonii/Lactobacillus_hominis/Lactobacillus_rodentium/FN667084_s/Lactobacillus_amylovorus/Lactobacillus_crispatus/Lactobacillus_kalixensis/Lactobacillus_taiwanensis                                                                                                                                                                                                                                                                                                                                                              | 117587/127919/85874/85875/85904/95031/95041/95044/95067/95231/95239/95242/95646/95665/95889                                                                                                                                                                                                                                                                                                                     | Healthy           | 0.654              |
| 6.829             | Firmicutes    | Clostridia  | Clostridiales   | Lachnospiraceae                 | Eisenbergiella                                              | AB626943_s/EU457259_s/EF603797_s/EU622677_s/EU457126_s                                                                                                                                                                                                                                                                                                                                                                                                                                                                                                                                                                                                                                                                         | 103742/107624/107627/109826/84929                                                                                                                                                                                                                                                                                                                                                                               | Healthy           | 0.528              |
| 6.557             | Bacteroidetes | Bacteroidia | Bacteroidales   | S24-7_f                         | DQ815871_g                                                  | EF603701_s/EU474208_s/EF099993_s/HM124175_s/EU456490_s                                                                                                                                                                                                                                                                                                                                                                                                                                                                                                                                                                                                                                                                         | 101731/103735/107617/108613/123282                                                                                                                                                                                                                                                                                                                                                                              | Healthy           | 0.611              |
| 5.916             | Firmicutes    | Clostridia  | Clostridiales   | Ruminococcaceae                 | Oscillibacter                                               | FJ880499_s/EF602810_s/EU505076_s/GU302582_s/FJ880976_s/FJ881211_s/EU454374_s/EU771312_s/EU454366_s/EU453793_s/KE159714_s                                                                                                                                                                                                                                                                                                                                                                                                                                                                                                                                                                                                       | 103700/107590/107598/107599/109224/110626/116255/116284/116308/121628/139962                                                                                                                                                                                                                                                                                                                                    | Healthy           | 0.613              |
| 5.416             | Bacteroidetes | Bacteroidia | Bacteroidales   | S24-7_f                         | HM124247_g                                                  | EF603835_s/EF097965_s/EU455014_s                                                                                                                                                                                                                                                                                                                                                                                                                                                                                                                                                                                                                                                                                               | 101684/103744/107601                                                                                                                                                                                                                                                                                                                                                                                            | Healthy           | 0.657              |
| 4.652             | Bacteroidetes | Bacteroidia | Bacteroidales   | S24-7_f                         | EF602759_g/EU622749_g                                       | EF604981_s/HM123985_s/EU450917_s                                                                                                                                                                                                                                                                                                                                                                                                                                                                                                                                                                                                                                                                                               | 103776/107567/123229                                                                                                                                                                                                                                                                                                                                                                                            | Healthy           | 0.778              |
| 4.558             | Firmicutes    | Clostridia  | Clostridiales   | Ruminococcaceae/Lachnospiraceae | Pseudoflavonifractor/Butyricoccus/Eisenbergiella/FJ374222_g | Pseudoflavonifractor_capillosus/Eubacterium_desmolans/JQ191036_s/EF404944_s/KI535319_s/FJ881243_s/HM124177_s/EF603680_s/EF604701_s/AB606283_s/EF097039_s/ADDX_s/FJ374222_s/Flavonifractor_plautii/AB606233_s/AY244908_s/FJ879530_s/EF603862_s/EF603786_s/AY858452_s/AB626937_s/EU622686_s/BCAB_s/AB606341_s/EU794285_s/FJ879507_s/AB606380_s/GQ897291_s/EF400624_s/EF071402_s/PAC000182_s/JQ083832_s/EU505160_s/AB606266_s/AB606386_s/FJ880805_s/EU456711_s/DQ015070_s/AY992183_s/JQ084492_s/JQ084301_s/EU773377_s/DQ456429_s/HQ716472_s/EF404855_s/FJ510897_s/DQ057387_s/EU509811_s/JQ084116_s/DQ456157_s/JQ084120_s/EF096610_s/HQ750839_s/Intestinimonas_butyrificiproducens/GQ867588_s/FJ880402_s/FJ368283_s/EU454100_s/EU4 | 100395/100646/101556/101664/101669/101672/102250/102321/102325/103732/103741/103748/103773/103892/104268/104284/106717/107596/107620/107724/108101/109210/109226/109289/109472/109831/110754/110830/111111/112154/113204/113242/114211/116208/116209/116250/116273/116312/120648/120687/123220/123283/127181/127401/127454/127589/127827/130498/134093/134182/135159/135163/135164/135166/135171/135178/135303/ | Healthy           | 0.601              |

|        |                |                   |                   |                    |                 |                                                                                                                                                                                                                                                                                                                                     |                                                                                                                                                                                |         |       |
|--------|----------------|-------------------|-------------------|--------------------|-----------------|-------------------------------------------------------------------------------------------------------------------------------------------------------------------------------------------------------------------------------------------------------------------------------------------------------------------------------------|--------------------------------------------------------------------------------------------------------------------------------------------------------------------------------|---------|-------|
|        |                |                   |                   |                    |                 | 65687_s/EU460161_s/EU504346_s/EU344341_s/EF644509_s/EU009861_s/EU009822_s/AM278900_s/EF096916_s/DQ815545_s/AB606256_s/JN713225_s/HM123968_s/HQ782969_s/HQ821334_s/JX198570_s/JX047097_s/HQ759796_s/JQ599692_s/EU775346_s/EU888823_s/AB062828_s/AY916184_s/EU542517_s/JQ084175_s/JN680614_s/DQ795333_s                               | 136192/137750/138265/139755/140361/141122/142006/80589/81115/84772/84784/84792/84801/84831/84849/84853/84926/85961/90333/92836/94458/94607/94957/95439/97493/97598/99582/99594 |         |       |
| 4.526  | Firmicutes     | Clostridia        | Clostridiales     | Lachnospiraceae    | AY305316_g      | EU456172_s                                                                                                                                                                                                                                                                                                                          | 107613                                                                                                                                                                         | Healthy | 0.507 |
| 4.4567 | Firmicutes     | Clostridia        | Clostridiales     | Ruminococcaceae    | Oscillibacter   | AB606367_s/EF602808_s/JQ084467_s                                                                                                                                                                                                                                                                                                    | 103699/135173/84845                                                                                                                                                            | Healthy | 0.666 |
| 4.316  | Firmicutes     | Bacilli           | Lactobacillales   | Lactobacillaceae   | Lactobacillus   | Lactobacillus_apodemi/Lactobacillus_animalis/Lactobacillus_faecis/Lactobacillus_murinus                                                                                                                                                                                                                                             | 85634/86083/95249/95520                                                                                                                                                        | Healthy | 0.726 |
| 4.180  | Bacteroidetes  | Bacteroidia       | Bacteroidales     | S24-7_f            | DQ815871_g      | DQ815395_s                                                                                                                                                                                                                                                                                                                          | 100637                                                                                                                                                                         | Healthy | 0.751 |
| 4.149  | Firmicutes     | Clostridia        | Clostridiales     | Lachnospiraceae    | Eisenbergiella  | EF603669_s                                                                                                                                                                                                                                                                                                                          | 103730                                                                                                                                                                         | Healthy | 0.507 |
| 3.949  | Firmicutes     | Clostridia        | Clostridiales     | Lachnospiraceae    | KE159538_g      | KE159538_s                                                                                                                                                                                                                                                                                                                          | 139953                                                                                                                                                                         | Healthy | 0.620 |
| 3.924  | Bacteroidetes  | Bacteroidia       | Bacteroidales     | S24-7_f            | FJ881296_g      | EF406456_s                                                                                                                                                                                                                                                                                                                          | 102343                                                                                                                                                                         | Healthy | 0.793 |
| 3.354  | Actinobacteria | Actinobacteriales | Bifidobacteriales | Bifidobacteriaceae | Bifidobacterium | Bifidobacterium_choerinum/Bifidobacterium_pseudolongum                                                                                                                                                                                                                                                                              | 130483/130566/92228                                                                                                                                                            | Healthy | 0.551 |
| 3.311  | Bacteroidetes  | Bacteroidia       | Bacteroidales     | S24-7_f            | EF406773_g      | EF406773_s                                                                                                                                                                                                                                                                                                                          | 102358                                                                                                                                                                         | Healthy | 0.551 |
| 3.197  | Firmicutes     | Clostridia        | Clostridiales     | Ruminococcaceae    | Oscillibacter   | AB606333_s/AB606363_s/HM124063_s/FJ881219_s/AB606362_s/JQ085218_s/EU457459_s/EU509241_s                                                                                                                                                                                                                                             | 107630/109277/116309/123250/135196/84826/84842/84843                                                                                                                           | Healthy | 0.574 |
| 3.165  | Firmicutes     | Bacilli           | Lactobacillales   | Lactobacillaceae   | Lactobacillus   | Lactobacillus_reuteri/Lactobacillus_pantis/Lactobacillus_pontis/Lactobacillus_antri/Lactobacillus_vaginalis/Lactobacillus_oris/Lactobacillus_frumenti                                                                                                                                                                               | 143355/85903/86957/89050/91592/95057/95077                                                                                                                                     | Healthy | 0.562 |
| 2.718  | Bacteroidetes  | Bacteroidia       | Bacteroidales     | S24-7_f            | EF602759_g      | DQ815429_s                                                                                                                                                                                                                                                                                                                          | 100640                                                                                                                                                                         | Healthy | 0.567 |
| 12.406 | Bacteroidetes  | Bacteroidia       | Bacteroidales     | Bacteroidaceae     | Bacteroides     | Bacteroides_fragilis/Bacteroides_salyersiae/Bacteroides_acidifaciens/Bacteroides_finegoldii/Bacteroides_thetaiotaomicron/Bacteroides_xylanisolvens/AB021165_s/DQ798855_s/Bacteroides_faecichinchillae/Bacteroides_faecis/AY986255_s/FJ371693_s/FJ368968_s/JH815484_s/HQ769253_s/HQ804309_s/Bacteroides_ovatus/HQ789817_s/DQ805799_s | 100427/100475/101203/113206/113213/127510/127651/127740/130536/80812/82489/86035/88159/90221/91731/94946/95194/95223/96915                                                     | Colitis | 0.557 |
| 7.897  | Bacteroidetes  | Bacteroidia       | Bacteroidales     | S24-7_f            | FJ880046_g      | EF406536_s                                                                                                                                                                                                                                                                                                                          | 102347                                                                                                                                                                         | Colitis | 0.880 |
| 6.354  | Bacteroidetes  | Bacteroidia       | Bacteroidales     | S24-7_f            | HM124117_g      | EF097184_s                                                                                                                                                                                                                                                                                                                          | 101677                                                                                                                                                                         | Colitis | 0.713 |
| 5.869  | Bacteroidetes  | Bacteroidia       | Bacteroidales     | Rikenellaceae      | Alistipes       | DQ815748_s/FJ510995_s                                                                                                                                                                                                                                                                                                               | 100663/114212                                                                                                                                                                  | Colitis | 0.647 |
| 5.044  | Bacteroidetes  | Bacteroidia       | Bacteroidales     | Porphyromonadaceae | Parabacteroides | Parabacteroides_goldsteirii                                                                                                                                                                                                                                                                                                         | 91730                                                                                                                                                                          | Colitis | 0.503 |

|       |               |             |               |                 |               |                       |              |         |       |
|-------|---------------|-------------|---------------|-----------------|---------------|-----------------------|--------------|---------|-------|
| 4.991 | Bacteroidetes | Bacteroidia | Bacteroidales | S24-7_f         | EF406806_g    | EF603121_s            | 103716       | Colitis | 0.623 |
| 4.688 | Bacteroidetes | Bacteroidia | Bacteroidales | S24-7_f         | EF406806_g    | EF603904_s            | 103750       | Colitis | 0.557 |
| 4.676 | Bacteroidetes | Bacteroidia | Bacteroidales | S24-7_f         | HM124247_g    | EF406368_s            | 102341       | Colitis | 0.844 |
| 4.029 | Bacteroidetes | Bacteroidia | Bacteroidales | S24-7_f         | EF406712_g    | EF406712_s            | 102356       | Colitis | 0.635 |
| 3.462 | Firmicutes    | Clostridia  | Clostridiales | EU234093_f      | AB606326_g    | AB606326_s/EF604610_s | 103758/84822 | Colitis | 0.533 |
| 3.287 | Bacteroidetes | Bacteroidia | Bacteroidales | S24-7_f         | HM124247_g    | EF603149_s            | 103717       | Colitis | 0.587 |
| 3.180 | Firmicutes    | Clostridia  | Clostridiales | Ruminococcaceae | Anaerotruncus | DQ168656_s/KE159677_s | 139961/98138 | Colitis | 0.551 |

**TABLE 2** Thirty-three taxa selected through Boruta feature selection for inclusion in dysbiosis index. The median importance is the median importance score calculated by the Boruta algorithm. EZTaxon ID refer to the ID number in the EZTaxon database. Proportion present refers to the proportion of healthy or colitis samples the taxon was present in.
